# Supplementary material for: Amyloid-β and caspase-1 are indicators of sepsis and organ injury
Source: PubMed Central journal article supplement (PMC10895426; doi:10.1183/23120541.00572-2023), 2024-02-26
Supplement: 00572-2023.SUPPLEMENT.pdf [file 00572-2023.SUPPLEMENT.pdf]

**Supplemental Table 1. Distribution of Analytes Compared to Healthy Controls\***

|                           |                | Healthy Controls | ICU Non-Sepsis | ICU Sepsis |
|---------------------------|----------------|------------------|----------------|------------|
| Caspase-1                 | % Below Median | 50.00%           | 16.67%         | 5.26%      |
|                           | % Above Median | 50.00%           | 83.33%         | 94.74%     |
|                           | p-value        |                  | <0.0001        | <0.0001    |
| IL-18                     | % Below Median | 48.65%           | 44.44%         | 18.18%     |
|                           | % Above Median | 51.35%           | 55.56%         | 81.82%     |
|                           | p-value        |                  | NS             | <0.0001    |
| A $\beta$ <sub>x-40</sub> | % Below Median | 50.00%           | 50.00%         | 20.00%     |
|                           | % Above Median | 50.00%           | 50.00%         | 80.00%     |
|                           | p-value        |                  | NS             | <0.0001    |

\*ICU patient data distribution was compared to that of the healthy controls and represented at percent of data points above or below the healthy control median using a two-sided 1 proportion z-test with  $p < 0.05$  considered significant. NS = not significant.

**Supplemental Table 2. Analyte Variance\***

| Analyte                        | Healthy Control                            | ICU Non-Sepsis   | ICU Sepsis        | p-value |
|--------------------------------|--------------------------------------------|------------------|-------------------|---------|
| Caspase-1                      | n <sup>^</sup> = 54<br>23.719 <sup>#</sup> | n= 36<br>89.872  | n= 76<br>741.309  | <0.0001 |
| IL-18                          | n= 37<br>84.638                            | n= 36<br>408.982 | n= 77<br>2291.827 | 0.0031  |
| A $\beta$ <sub>x-40</sub>      | n= 54<br>131.606                           | n= 36<br>134.405 | n= 75<br>213.089  | <0.0001 |
| A $\beta$ <sub>x-42</sub>      | n= 15<br>150.976                           | n= 30<br>16.106  | n= 55<br>93.483   | 0.0002  |
| A $\beta$ <sub>x-42/x-40</sub> | n= 15<br>0.220                             | n= 30<br>0.145   | n= 54<br>0.127    | 0.0056  |
| TNF- $\alpha$                  | n= 35<br>131.544                           | n= 22<br>25.833  | n= 54<br>268.141  | 0.0011  |
| IL-6                           | n= 33<br>48.543                            | n= 35<br>109.424 | n= 75<br>2964.922 | 0.0457  |
| IL-8                           | n= 36<br>60.780                            | n= 33<br>106.909 | n= 65<br>1011.525 | 0.0419  |
| IFN- $\alpha$                  | n= 24<br>24.887                            | n= 21<br>12.083  | n= 52<br>127.086  | 0.0030  |

\*A majority of these analytes tested displayed a high level of variance. Levene's test with a p < 0.05 was used to identify analyte variants that are statistically different.

<sup>^</sup>Number of observations

<sup>#</sup>Standard deviations

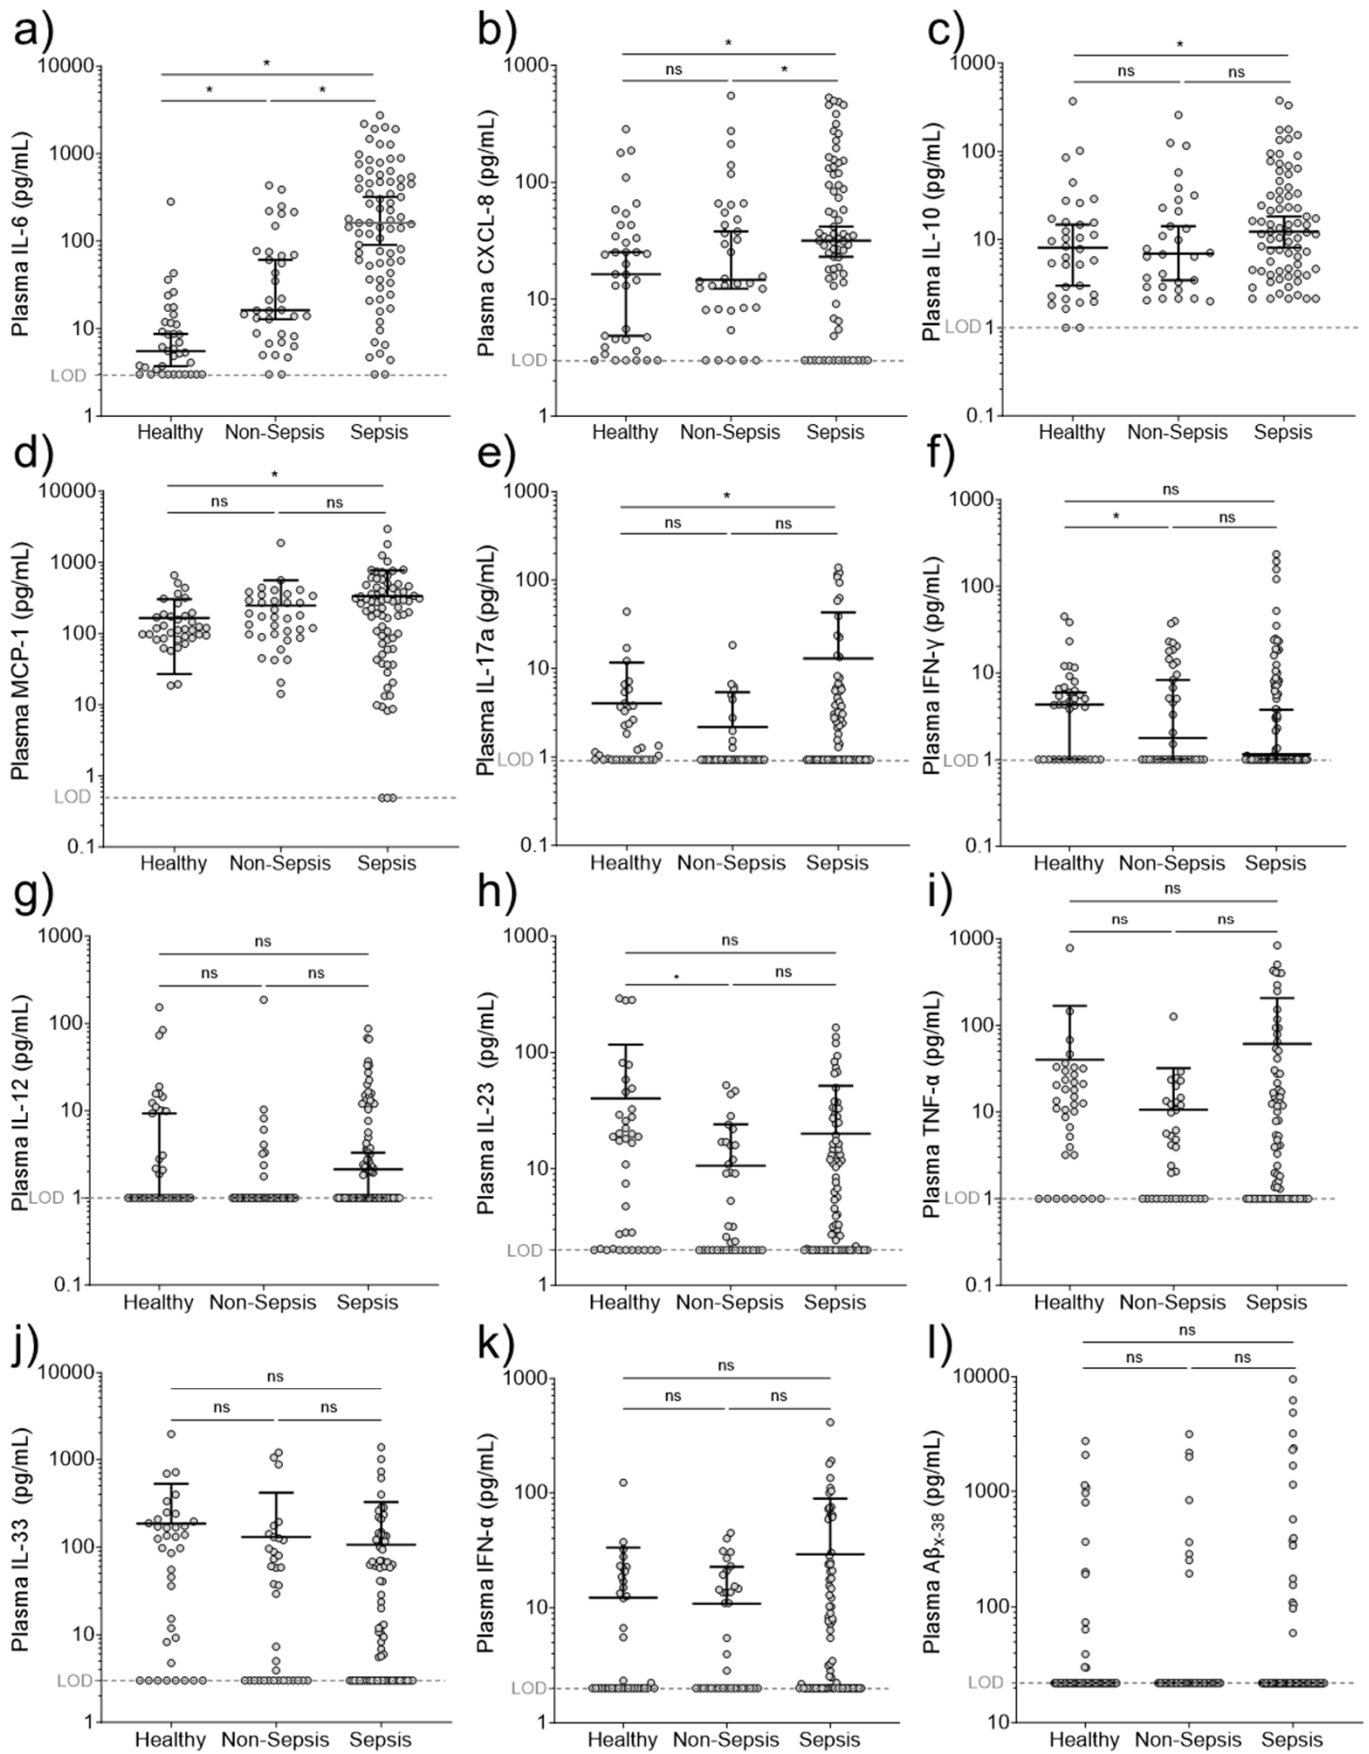

**Supplemental Figure 1.** Other plasma cytokine analytes. \*  $p < 0.05$  was considered significant when comparing medians using a Steel test.

| Characteristic               | Pulmonary Sepsis<br>(n = 39) | Non-Pulmonary Sepsis<br>(n = 38) |
|------------------------------|------------------------------|----------------------------------|
| Average Age - yr. (range)    | 60.1 (21-91)                 | 57.6 (20-87)                     |
| Male sex - no./total. (%)    | 20/39 (51.3%)                | 22/38 (57.9%)                    |
| Female Sex -no./total. (%)   | 19/39 (48.7%)                | 16/38 (42.1%)                    |
| Race - no./total. (%)        |                              |                                  |
| White                        | 18/39 (46.2%)                | 17/38 (44.7%)                    |
| Black                        | 21/39 (53.8%)                | 21/38 (55.3%)                    |
| Intubated - no./total. (%)   | 25/39 (64.1%)                | 7/36 <sup>^</sup> (19.4%)        |
| Vasopressor - no./total. (%) | 9/39 (23.1%)                 | 12/38 (31.6%)                    |

<sup>^</sup>Intubation status of 2 Sepsis Non-Pulmonary patients are unknown.

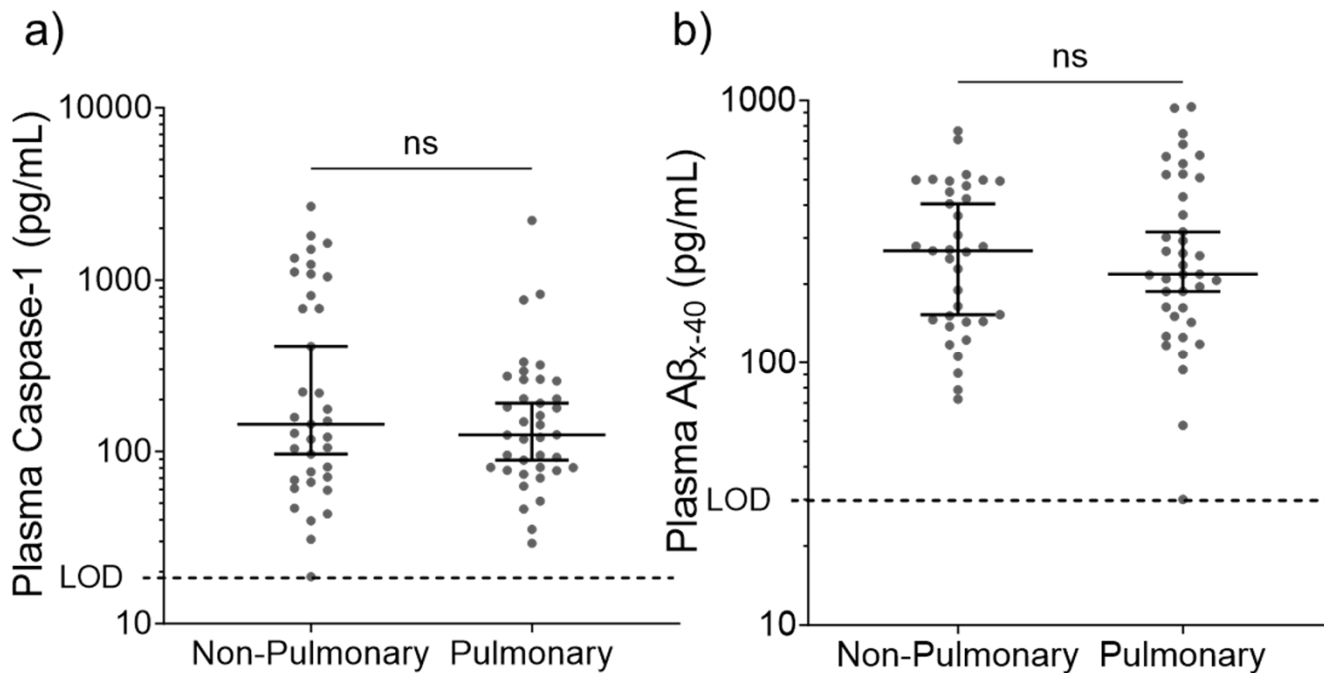

**Supplemental Figure 2.** The origin of the sepsis infection does not significantly alter cytokine levels. When the sepsis group is subdivided into either sepsis of a pulmonary origin or sepsis of a non-pulmonary origin, **a)** Caspase-1 and **b)** Aβ<sub>x-40</sub> are not significantly different between the two sepsis groups.

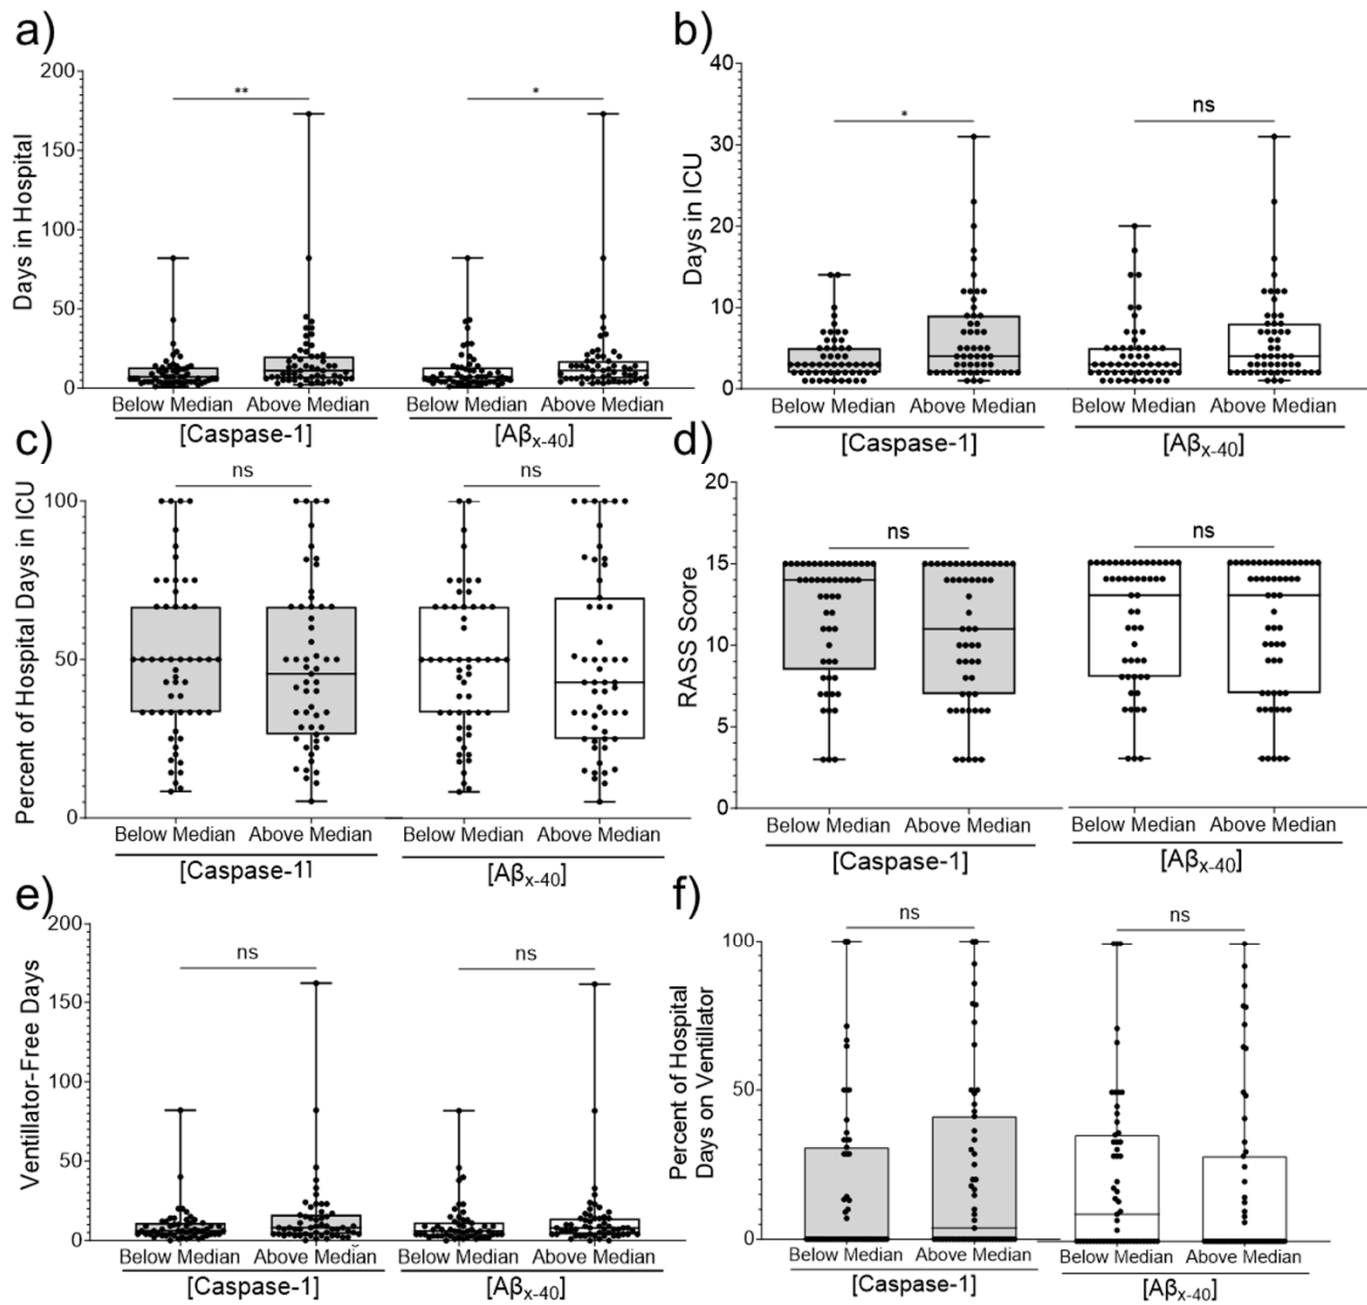

**Supplemental Figure 3.** Other patient outcome data. \*  $p < 0.05$  or \*\*  $p < 0.01$  were considered significant when comparing medians using the Mann-Whitney test.
